# Supplementary material
Source: PubMed Central journal article supplement (PMC314143)
Supplement: pnas_101_1_87__1.pdf [file pnas_101_1_87__1.pdf]

**Table 5. Expected vs. actual frequency of amyloidogenic three-residue motifs in protein sequences**

| Motif* | $P_X^\dagger$        | $R_{E(ADW)}^\ddagger$<br>$P_X/P_{ADW}$ | $R_{E(VIS)}^\ddagger$<br>$P_X/P_{VIS}$ | Nonredundant protein sequences* |                 |                                                     |                                                     | TrEMBL*         |                 |                                                     |                                                     |
|--------|----------------------|----------------------------------------|----------------------------------------|---------------------------------|-----------------|-----------------------------------------------------|-----------------------------------------------------|-----------------|-----------------|-----------------------------------------------------|-----------------------------------------------------|
|        |                      |                                        |                                        | $R_{O(ADW)}^\S$                 | $R_{O(VIS)}^\S$ | $R_E/R_{O(ADW)}^\parallel$<br>$\pm 0.178^\parallel$ | $R_E/R_{O(VIS)}^\parallel$<br>$\pm 0.167^\parallel$ | $R_{O(ADW)}^\S$ | $R_{O(VIS)}^\S$ | $R_E/R_{O(ADW)}^\parallel$<br>$\pm 0.226^\parallel$ | $R_E/R_{O(VIS)}^\parallel$<br>$\pm 0.220^\parallel$ |
| VII    | 2.949e <sup>-4</sup> | 5.765                                  | 1.067                                  | 2.716                           | 0.526           | 2.122                                               | 2.026                                               | 2.301           | 0.436           | 2.506                                               | 2.447                                               |
| LEF    | 3.039e <sup>-4</sup> | 5.941                                  | 1.099                                  | 3.304                           | 0.640           | 1.798                                               | 1.716                                               | 3.300           | 0.625           | 1.800                                               | 1.759                                               |
| WEF    | 3.377e <sup>-5</sup> | 0.660                                  | 0.1222                                 | 0.524                           | 0.102           | 1.259                                               | 1.202                                               | 0.366           | 0.069           | 1.802                                               | 1.761                                               |
| LNF    | 1.770e <sup>-4</sup> | 3.458                                  | 0.640                                  | 4.130                           | 0.801           | 0.837                                               | 0.799                                               | 4.127           | 0.782           | 0.838                                               | 0.819                                               |
| VIV    | 3.318e <sup>-4</sup> | 6.486                                  | 1.200                                  | 4.933                           | 0.955           | 1.315                                               | 1.256                                               | 4.968           | 0.952           | 1.306                                               | 1.2611                                              |
| ADW    | 5.116e <sup>-5</sup> | —                                      | 0.186                                  | —                               | 0.194           | —                                                   | <u>0.960</u>                                        | —               | 0.189           | —                                                   | <u>0.982</u>                                        |
| VIS    | 2.765e <sup>-4</sup> | 5.405                                  | —                                      | 5.159                           | —               | <u>1.045</u>                                        | —                                                   | 5.279           | —               | <u>1.024</u>                                        | —                                                   |

| Motif* | $P_X^\dagger$        | $R_{E(ADW)}^\ddagger$<br>$P_X/P_{ADW}$ | $R_{E(VIS)}^\ddagger$<br>$P_X/P_{VIS}$ | Swiss-Prot and TrEMBL* |                 |                                                     |                                                     | Swiss-Prot*     |                 |                                                     |                                                     |
|--------|----------------------|----------------------------------------|----------------------------------------|------------------------|-----------------|-----------------------------------------------------|-----------------------------------------------------|-----------------|-----------------|-----------------------------------------------------|-----------------------------------------------------|
|        |                      |                                        |                                        | $R_{O(ADW)}^\S$        | $R_{O(VIS)}^\S$ | $R_E/R_{O(ADW)}^\parallel$<br>$\pm 0.167^\parallel$ | $R_E/R_{O(VIS)}^\parallel$<br>$\pm 0.161^\parallel$ | $R_{O(ADW)}^\S$ | $R_{O(VIS)}^\S$ | $R_E/R_{O(ADW)}^\parallel$<br>$\pm 0.097^\parallel$ | $R_E/R_{O(VIS)}^\parallel$<br>$\pm 0.115^\parallel$ |
| VII    | 2.949e <sup>-4</sup> | 5.765                                  | 1.067                                  | 2.825                  | 0.540           | 2.041                                               | 1.975                                               | 4.510           | 0.705           | 1.278                                               | 1.514                                               |
| LEF    | 3.039e <sup>-4</sup> | 5.941                                  | 1.099                                  | 3.317                  | 0.634           | 1.791                                               | 1.734                                               | 3.830           | 0.598           | 1.551                                               | 1.837                                               |
| WEF    | 3.377e <sup>-5</sup> | 0.660                                  | 0.1222                                 | 0.520                  | 0.099           | 1.270                                               | 1.229                                               | 0.453           | 0.071           | 1.457                                               | 1.726                                               |
| LNF    | 1.770e <sup>-4</sup> | 3.458                                  | 0.640                                  | 4.181                  | 0.799           | 0.827                                               | 0.801                                               | 3.347           | 0.523           | 1.033                                               | 1.224                                               |
| VIV    | 3.318e <sup>-4</sup> | 6.486                                  | 1.200                                  | 4.989                  | 0.955           | 1.300                                               | 1.256                                               | 5.809           | 0.904           | 1.117                                               | 1.327                                               |
| ADW    | 5.116e <sup>-5</sup> | —                                      | 0.186                                  | —                      | 0.191           | —                                                   | <u>0.974</u>                                        | —               | 0.156           | —                                                   | <u>1.191</u>                                        |
| VIS    | 2.765e <sup>-4</sup> | 5.405                                  | —                                      | 5.231                  | —               | <u>1.033</u>                                        | —                                                   | 6.402           | —               | <u>0.844</u>                                        | —                                                   |

\*Motif database scanning has been carried out by using PATTINPROT (1).

<sup>†</sup>Motif probabilities have been calculated as the product of the expected individual amino acid frequencies (see *Methods* in the main text).

<sup>‡</sup> $R_E$  is the expected distribution of a given motif  $X$  with respect to a control amino acid sequence  $C$  (ADW or VIS):  $R_{E(ADW)} = P_X/P_{ADW}$  and  $R_{E(VIS)} = P_X/P_{VIS}$ .

<sup>§</sup> $R_O$  is the observed representation of a given three-residue motif  $X$  with respect to a control amino acid sequence (ADW or VIS) on the protein database:

$R_{O(ADW)} = O_X/O_{ADW}$  and  $R_{O(VIS)} = O_X/O_{VIS}$ .

<sup>¶</sup> $R_E/R_O > 1$ ,  $X$  is underrepresented;  $R_E/R_O \approx 1$ ,  $X$  appears as expected;  $R_E/R_O < 1$ ,  $X$  is overrepresented.

<sup>||</sup> $\pm$  SE.

1. Combet, C., Blanchet, C., Geourjon, C. & Deleage, G. (2000) *Trends Biochem. Sci.* **25**, 147-150.
