# Supplementary material
Source: PubMed Central journal article supplement (PMC314143)
Supplement: pnas_101_1_87__2.pdf [file pnas_101_1_87__2.pdf]

**Table 6. Observed no. of three-residue motifs in protein sequences**

| Motif* | Nonredundant protein sequences<br>(884,894) <sup>†</sup> |                                  |                                  | TrEMBL<br>(1,036,258) <sup>†</sup> |                                  |                                  | Swiss-Prot and TrEMBL<br>(847,587) <sup>†</sup> |                                  |                                  | Swiss-Prot<br>(122,214) <sup>†</sup> |                                  |                                  |
|--------|----------------------------------------------------------|----------------------------------|----------------------------------|------------------------------------|----------------------------------|----------------------------------|-------------------------------------------------|----------------------------------|----------------------------------|--------------------------------------|----------------------------------|----------------------------------|
|        | O <sub>X</sub>                                           | R <sub>O(ADW)</sub> <sup>‡</sup> | R <sub>O(VIS)</sub> <sup>‡</sup> | O <sub>X</sub>                     | R <sub>O(ADW)</sub> <sup>‡</sup> | R <sub>O(VIS)</sub> <sup>‡</sup> | O <sub>X</sub>                                  | R <sub>O(ADW)</sub> <sup>‡</sup> | R <sub>O(VIS)</sub> <sup>‡</sup> | O <sub>X</sub>                       | R <sub>O(ADW)</sub> <sup>‡</sup> | R <sub>O(VIS)</sub> <sup>‡</sup> |
| VII    | 37,473                                                   | 2.716                            | 0.526                            | 37,410                             | 2.301                            | 0.436                            | 37,423                                          | 2.825                            | 0.540                            | 9,332                                | 4.510                            | 0.705                            |
| LEF    | 45,588                                                   | 3.304                            | 0.640                            | 53,657                             | 3.300                            | 0.625                            | 43,936                                          | 3.317                            | 0.634                            | 7,924                                | 3.830                            | 0.598                            |
| WEF    | 7,230                                                    | 0.524                            | 0.102                            | 5,955                              | 0.366                            | 0.069                            | 6,887                                           | 0.520                            | 0.099                            | 937                                  | 0.453                            | 0.071                            |
| LNF    | 56,977                                                   | 4.130                            | 0.801                            | 67,098                             | 4.127                            | 0.782                            | 55,386                                          | 4.181                            | 0.799                            | 6,925                                | 3.347                            | 0.523                            |
| ADW    | 13,796                                                   | —                                | 0.194                            | 16,260                             | —                                | 0.189                            | 13,247                                          | —                                | 0.191                            | 2,069                                | —                                | 0.156                            |
| VIS    | 71,178                                                   | 5.159                            | —                                | 85,836                             | 5.279                            | —                                | 69,300                                          | 5.231                            | —                                | 13,245                               | 6.402                            | —                                |

| Motif* | Nonredundant protein sequences<br>(1,026,709) <sup>†</sup> |                                  |                                  | TrEMBL<br>(1,087,429) <sup>†</sup> |                                  |                                  | Swiss-Prot and TrEMBL<br>(988,484) <sup>†</sup> |                                  |                                  | Swiss-Prot<br>(125,236) <sup>†</sup> |                                  |                                  |
|--------|------------------------------------------------------------|----------------------------------|----------------------------------|------------------------------------|----------------------------------|----------------------------------|-------------------------------------------------|----------------------------------|----------------------------------|--------------------------------------|----------------------------------|----------------------------------|
|        | O <sub>X</sub>                                             | R <sub>O(ADW)</sub> <sup>‡</sup> | R <sub>O(VIS)</sub> <sup>‡</sup> | O <sub>X</sub>                     | R <sub>O(ADW)</sub> <sup>‡</sup> | R <sub>O(VIS)</sub> <sup>‡</sup> | O <sub>X</sub>                                  | R <sub>O(ADW)</sub> <sup>‡</sup> | R <sub>O(VIS)</sub> <sup>‡</sup> | O <sub>X</sub>                       | R <sub>O(ADW)</sub> <sup>‡</sup> | R <sub>O(VIS)</sub> <sup>‡</sup> |
| VIV    | 80,645                                                     | 4.933                            | 0.955                            | 86,306                             | 4.968                            | 0.952                            | 78,620                                          | 4.989                            | 0.955                            | 12,350                               | 5.809                            | 0.904                            |
| ADW    | 16,349                                                     | —                                | 0.194                            | 17,373                             | —                                | 0.192                            | 15,760                                          | —                                | 0.191                            | 2,126                                | —                                | 0.156                            |
| VIS    | 84,411                                                     | 5.163                            | —                                | 90,703                             | 5.221                            | —                                | 82,318                                          | 5.231                            | —                                | 13,659                               | 6.425                            | —                                |

\*Motif database scanning has been carried by out using PATTINPROT (1).

<sup>†</sup>Total number of proteins on the database.

<sup>‡</sup>R<sub>O</sub> is the ratio between the number of hits found on the database for a given motif X and a control amino acid sequence C (ADW or VIS)

1. Combet, C., Blanchet, C., Geourjon, C. & Deleage, G. (2000) *Trends Biochem. Sci.* **25**, 147-150.
