# Supplementary material
Source: PubMed Central journal article supplement (PMC314143)
Supplement: pnas_101_1_87__3.pdf [file pnas_101_1_87__3.pdf]

**Table 7. Expected vs. actual frequency of the three-residue amyloidogenic motif VII surrounded by amyloid breakers in protein databases**

| Motif*                       | $P_{VIIXX} (P_{XXVII})^\dagger$ | Nonredundant protein sequences (NR)* |                            | TrEMBL (Tr)*                     |                            | Swiss-Prot and TrEMBL (SP + Tr)* |                            | SwissProt (SP)*                  |                            |
|------------------------------|---------------------------------|--------------------------------------|----------------------------|----------------------------------|----------------------------|----------------------------------|----------------------------|----------------------------------|----------------------------|
|                              |                                 | $O_{VIIXX} (O_{XXVII})^\ddagger$     | $E_{VIIXX} (E_{XXVII})^\S$ | $O_{VIIXX} (O_{XXVII})^\ddagger$ | $E_{VIIXX} (E_{XXVII})^\S$ | $O_{VIIXX} (O_{XXVII})^\ddagger$ | $E_{VIIXX} (E_{XXVII})^\S$ | $O_{VIIXX} (O_{XXVII})^\ddagger$ | $E_{VIIXX} (E_{XXVII})^\S$ |
| VII ++ <sup>  </sup>         | 3.699e <sup>-6</sup>            | 492                                  | 470.07                     | 401                              | 469.28                     | 489                              | 469.44                     | 88                               | 115.63                     |
| ++ VII                       | 3.699e <sup>-6</sup>            | 1,022                                | 470.07                     | 794                              | 469.28                     | 1,006                            | 469.44                     | 213                              | 115.63                     |
| VII --                       | 3.968e <sup>-6</sup>            | 1,209                                | 504.24                     | 995                              | 503.39                     | 1,201                            | 503.56                     | 206                              | 124.04                     |
| -- VII                       | 3.968e <sup>-6</sup>            | 1,739                                | 504.24                     | 1,552                            | 503.39                     | 1,744                            | 503.56                     | 193                              | 124.04                     |
| P VII                        | 1.298e <sup>-5</sup>            | 3,471                                | 1,648.8                    | 2,877                            | 1,646.0                    | 3,395                            | 1,646.6                    | 517                              | 405.59                     |
| VII P                        | 1.298e <sup>-5</sup>            | 3,192                                | 1,648.8                    | 2,686                            | 1,646.0                    | 3,193                            | 1,646.6                    | 475                              | 405.59                     |
| P + VII                      | 1.453e <sup>-6</sup>            | 319                                  | 184.66                     | 211                              | 184.35                     | 265                              | 184.42                     | 55                               | 45.426                     |
| VII + P                      | 1.453e <sup>-6</sup>            | 244                                  | 184.66                     | 179                              | 184.35                     | 226                              | 184.42                     | 48                               | 45.426                     |
| P - VII                      | 1.505e <sup>-6</sup>            | 594                                  | 191.26                     | 517                              | 190.94                     | 595                              | 191.00                     | 79                               | 47.048                     |
| VII - P                      | 1.505e <sup>-6</sup>            | 272                                  | 191.26                     | 199                              | 190.94                     | 259                              | 191.00                     | 61                               | 47.048                     |
| + P VII                      | 1.453e <sup>-6</sup>            | 480                                  | 184.66                     | 395                              | 184.35                     | 464                              | 184.42                     | 69                               | 45.426                     |
| VII P +                      | 1.453e <sup>-6</sup>            | 300                                  | 184.66                     | 241                              | 184.35                     | 299                              | 184.42                     | 58                               | 45.426                     |
| - P VII                      | 1.505e <sup>-6</sup>            | 332                                  | 191.26                     | 279                              | 190.94                     | 326                              | 191.00                     | 48                               | 47.048                     |
| VII P -                      | 1.505e <sup>-6</sup>            | 336                                  | 191.26                     | 265                              | 190.94                     | 336                              | 191.00                     | 72                               | 47.048                     |
| Mean difference <sup>¶</sup> |                                 | 518.006                              |                            | 378.516                          |                            | 501.935                          |                            | 37.256                           |                            |
| df <sup>¶</sup>              |                                 | 13                                   |                            | 13                               |                            | 13                               |                            | 13                               |                            |
| t value <sup>¶</sup>         |                                 | 3.2572                               |                            | 3.0847                           |                            | 3.2103                           |                            | 3.3759                           |                            |
| t probability <sup>¶</sup>   |                                 | 0.006242                             |                            | 0.009455                         |                            | 0.006831                         |                            | 0.004968                         |                            |

\*Motif database scanning has been carried out by using PATTINPROT (1).

<sup>†</sup>Motif probabilities have been calculated as the product of the expected individual amino acid frequencies (see *Methods* in the main text).

<sup>‡</sup> $O_{VIIXX} (O_{XXVII})$  is the number of hits of an amyloid breaker motif that have been found on the database.

<sup>§</sup> $E_{VIIXX} (E_{XXVII})$  is the expected number of hits of a given amyloid breaker motif based on the average composition of proteins (see *Methods* in the main text) and the total number of VII hits found in database [ $O_{VII} (NR) = 37,473$ ;  $O_{VII} (Tr) = 37,410$ ;  $O_{VII} (SP + Tr) = 37,423$ ;  $O_{VII} (SP) = 369$ ].

<sup>¶</sup>Student's test of significance. VII is surrounded by amyloid breakers at a confidence level higher than 1%.

<sup>||</sup>VII ++ is the only amyloid breaker motif found as expected from amino acid composition.

1. Combet, C., Blanchet, C., Geourjon, C. & Deleage, G. (2000) *Trends Biochem. Sci.* **25**, 147-150.
