# Supplementary material
Source: PubMed Central journal article supplement (PMC314143)
Supplement: pnas_101_1_87__4.pdf [file pnas_101_1_87__4.pdf]

**Table 8. Expected vs. actual frequency of the three-residue amyloidogenic motif LEF surrounded by amyloid breakers in protein databases**

| Motif*                       | $P_{LEFXX}$<br>( $P_{XXLEF}$ ) <sup>†</sup> | Nonredundant protein sequences (NR)*        |                                             | TrEMBL (Tr)*                                |                                             | Swiss-Prot and TrEMBL (SP + Tr)*            |                                             | Swiss-Prot (SP)*                            |                                             |
|------------------------------|---------------------------------------------|---------------------------------------------|---------------------------------------------|---------------------------------------------|---------------------------------------------|---------------------------------------------|---------------------------------------------|---------------------------------------------|---------------------------------------------|
|                              |                                             | $O_{LEFXX}$<br>( $O_{XXLEF}$ ) <sup>‡</sup> | $E_{LEFXX}$<br>( $E_{XXLEF}$ ) <sup>§</sup> | $O_{LEFXX}$<br>( $O_{XXLEF}$ ) <sup>‡</sup> | $E_{LEFXX}$<br>( $E_{XXLEF}$ ) <sup>§</sup> | $O_{LEFXX}$<br>( $O_{XXLEF}$ ) <sup>‡</sup> | $E_{LEFXX}$<br>( $E_{XXLEF}$ ) <sup>§</sup> | $O_{LEFXX}$<br>( $O_{XXLEF}$ ) <sup>‡</sup> | $E_{LEFXX}$<br>( $E_{XXLEF}$ ) <sup>§</sup> |
| LEF ++                       | 3.812e <sup>-6</sup>                        | 520                                         | 571.86                                      | 633                                         | 673.08                                      | 515                                         | 551.14                                      | <b>108</b>                                  | <b>97.93</b>                                |
| ++ LEF                       | 3.812e <sup>-6</sup>                        | <b>1,055</b>                                | <b>571.86</b>                               | <b>1,206</b>                                | <b>673.08</b>                               | <b>1,032</b>                                | <b>551.14</b>                               | <b>117</b>                                  | <b>97.93</b>                                |
| LEF --                       | 4.089e <sup>-6</sup>                        | <b>763</b>                                  | <b>613.43</b>                               | <b>877</b>                                  | <b>722.01</b>                               | <b>732</b>                                  | <b>591.20</b>                               | <b>145</b>                                  | <b>105.05</b>                               |
| -- LEF                       | 4.089e <sup>-6</sup>                        | <b>873</b>                                  | <b>613.43</b>                               | <b>1026</b>                                 | <b>722.01</b>                               | <b>854</b>                                  | <b>591.20</b>                               | <b>175</b>                                  | <b>105.05</b>                               |
| P LEF                        | 1.337e <sup>-5</sup>                        | 1755                                        | 2005.9                                      | 2093                                        | 2360.9                                      | 1716                                        | 1933.2                                      | 346                                         | 343.51                                      |
| LEF P                        | 1.337e <sup>-5</sup>                        | 1631                                        | 2005.9                                      | 1867                                        | 2360.9                                      | 1520                                        | 1933.2                                      | 270                                         | 343.51                                      |
| P + LEF                      | 1.350e <sup>-6</sup>                        | 138                                         | 202.47                                      | 153                                         | 238.31                                      | 116                                         | 195.14                                      | 24                                          | 34.67                                       |
| LEF + P                      | 1.350e <sup>-6</sup>                        | 198                                         | 202.47                                      | 225                                         | 238.31                                      | 197                                         | 195.14                                      | 41                                          | 34.67                                       |
| P - LEF                      | 1.551e <sup>-6</sup>                        | 203                                         | 232.69                                      | 224                                         | 273.87                                      | 201                                         | 224.26                                      | 46                                          | 39.85                                       |
| LEF - P                      | 1.551e <sup>-6</sup>                        | 185                                         | 232.69                                      | 235                                         | 273.87                                      | 185                                         | 224.26                                      | 46                                          | 39.85                                       |
| + P LEF                      | 1.350e <sup>-6</sup>                        | 171                                         | 202.47                                      | 199                                         | 238.31                                      | 166                                         | 195.14                                      | 28                                          | 34.67                                       |
| LEF P +                      | 1.350e <sup>-6</sup>                        | 136                                         | 202.47                                      | 158                                         | 238.31                                      | 134                                         | 195.14                                      | 24                                          | 34.67                                       |
| - P LEF                      | 1.551e <sup>-6</sup>                        | <b>248</b>                                  | <b>232.69</b>                               | <b>292</b>                                  | <b>273.87</b>                               | <b>245</b>                                  | <b>224.26</b>                               | <b>56</b>                                   | <b>39.85</b>                                |
| LEF P -                      | 1.551e <sup>-6</sup>                        | 237                                         | 232.69                                      | 276                                         | 273.87                                      | 231                                         | 224.26                                      | 35                                          | 39.85                                       |
| Mean difference <sup>¶</sup> |                                             | 226.897                                     |                                             | 252.508                                     |                                             | 226.300                                     |                                             | 31.037                                      |                                             |
| df <sup>¶</sup>              |                                             | 3                                           |                                             | 3                                           |                                             | 3                                           |                                             | 4                                           |                                             |
| t value <sup>¶</sup>         |                                             | 2.2932                                      |                                             | 2.2914                                      |                                             | 2.3047                                      |                                             | 2.8344                                      |                                             |
| t probability <sup>¶</sup>   |                                             | 0.1053                                      |                                             | 0.1058                                      |                                             | 0.1045                                      |                                             | 0.04713                                     |                                             |

\*Motif database scanning has been carried out by using PATTINPROT (1).

<sup>†</sup>Motif probabilities have been calculated as the product of the expected individual amino acid frequencies (see *Methods* in the main text).

<sup>‡</sup> $O_{LEFXX}$  ( $O_{XXLEF}$ ) is the number of hits of an amyloid breaker motif that have been found on the database.

<sup>§</sup> $E_{LEFXX}$  ( $E_{XXLEF}$ ) is the expected number of hits of a given amyloid breaker motif based on the average composition of proteins (see *Methods* in the main text) and the total number of LEF hits found in database [ $O_{LEF}$  (NR) = 45,588;  $O_{LEF}$  (Tr) = 53,657;  $O_{LEF}$  (SP + Tr) = 43,936;  $O_{LEF}$  (SP) = 7,807].

<sup>¶</sup>Student's test of significance. Only data where  $O > E$  have been compared (boldface data).

1. Combet, C., Blanchet, C., Geourjon, C. & Deleage, G. (2000) *Trends Biochem. Sci.* **25**, 147-150.
