# Supplementary material
Source: PubMed Central journal article supplement (PMC314143)
Supplement: pnas_101_1_87__5.pdf [file pnas_101_1_87__5.pdf]

**Table 9. Expected vs. actual frequency of the three-residue amyloidogenic motif WEF surrounded by amyloid breakers in protein databases**

| Motif*                       | $P_{WEFXX}$<br>( $P_{XXWEF}$ ) <sup>†</sup> | Nonredundant protein sequences (NR)*        |                                             | TrEMBL (Tr)*                                |                                             | Swiss-Prot and TrEMBL (SP + Tr)*            |                                             | Swiss-Prot (SP)*                            |                                             |
|------------------------------|---------------------------------------------|---------------------------------------------|---------------------------------------------|---------------------------------------------|---------------------------------------------|---------------------------------------------|---------------------------------------------|---------------------------------------------|---------------------------------------------|
|                              |                                             | $O_{WEFXX}$<br>( $O_{XXWEF}$ ) <sup>‡</sup> | $E_{WEFXX}$<br>( $E_{XXWEF}$ ) <sup>§</sup> | $O_{WEFXX}$<br>( $O_{XXWEF}$ ) <sup>‡</sup> | $E_{WEFXX}$<br>( $E_{XXWEF}$ ) <sup>§</sup> | $O_{WEFXX}$<br>( $O_{XXWEF}$ ) <sup>‡</sup> | $E_{WEFXX}$<br>( $E_{XXWEF}$ ) <sup>§</sup> | $O_{WEFXX}$<br>( $O_{XXWEF}$ ) <sup>‡</sup> | $E_{WEFXX}$<br>( $E_{XXWEF}$ ) <sup>§</sup> |
| WEF ++                       | 4.236e <sup>-7</sup>                        | 45                                          | 90.69                                       | 35                                          | 74.70                                       | 45                                          | 86.39                                       | 10                                          | 11.69                                       |
| ++ WEF                       | 4.236e <sup>-7</sup>                        | 89                                          | 90.69                                       | 65                                          | 74.70                                       | 88                                          | 86.39                                       | <b>23</b>                                   | <b>11.69</b>                                |
| WEF --                       | 4.544e <sup>-7</sup>                        | <b>110</b>                                  | <b>97.29</b>                                | 82                                          | 80.13                                       | 92                                          | 92.67                                       | 10                                          | 12.54                                       |
| -- WEF                       | 4.544e <sup>-7</sup>                        | 79                                          | 97.29                                       | 68                                          | 80.13                                       | 77                                          | 92.67                                       | 9                                           | 12.54                                       |
| P WEF                        | 1.486e <sup>-6</sup>                        | 248                                         | 318.12                                      | 196                                         | 262.02                                      | 247                                         | 303.03                                      | <b>51</b>                                   | <b>41.01</b>                                |
| WEF P                        | 1.486e <sup>-6</sup>                        | <b>551</b>                                  | <b>318.12</b>                               | <b>440</b>                                  | <b>262.02</b>                               | <b>537</b>                                  | <b>303.03</b>                               | <b>97</b>                                   | <b>41.01</b>                                |
| P + WEF                      | 1.664e <sup>-7</sup>                        | <b>59</b>                                   | <b>35.63</b>                                | <b>49</b>                                   | <b>29.35</b>                                | <b>58</b>                                   | <b>33.94</b>                                | <b>9</b>                                    | <b>4.59</b>                                 |
| WEF + P                      | 1.664e <sup>-7</sup>                        | 20                                          | 35.63                                       | 13                                          | 29.35                                       | 20                                          | 33.94                                       | 7                                           | 4.59                                        |
| P – WEF                      | 1.724e <sup>-7</sup>                        | <b>1,124</b>                                | <b>36.90</b>                                | <b>967</b>                                  | <b>30.39</b>                                | <b>991</b>                                  | <b>35.15</b>                                | <b>24</b>                                   | <b>4.76</b>                                 |
| WEF – P                      | 1.724e <sup>-7</sup>                        | <b>76</b>                                   | <b>36.90</b>                                | <b>65</b>                                   | <b>30.39</b>                                | <b>76</b>                                   | <b>35.15</b>                                | <b>11</b>                                   | <b>4.76</b>                                 |
| + P WEF                      | 1.664e <sup>-7</sup>                        | 34                                          | 35.63                                       | 27                                          | 29.35                                       | 34                                          | 33.94                                       | 7                                           | 4.59                                        |
| WEF P +                      | 1.664e <sup>-7</sup>                        | <b>160</b>                                  | <b>35.63</b>                                | <b>117</b>                                  | <b>29.35</b>                                | <b>153</b>                                  | <b>33.94</b>                                | <b>36</b>                                   | <b>4.59</b>                                 |
| – P WEF                      | 1.724e <sup>-7</sup>                        | 17                                          | 36.90                                       | 12                                          | 30.39                                       | 16                                          | 35.15                                       | 4                                           | 4.76                                        |
| WEF P –                      | 1.724e <sup>-7</sup>                        | <b>51</b>                                   | <b>36.90</b>                                | <b>41</b>                                   | <b>30.39</b>                                | <b>51</b>                                   | <b>35.15</b>                                | <b>10</b>                                   | <b>4.76</b>                                 |
| Mean difference <sup>¶</sup> |                                             | 219.090                                     |                                             | 211.184                                     |                                             | 231.607                                     |                                             | 14.865                                      |                                             |
| df <sup>¶</sup>              |                                             | 6                                           |                                             | 5                                           |                                             | 5                                           |                                             | 9                                           |                                             |
| t value <sup>¶</sup>         |                                             | 1.482                                       |                                             | 1.4339                                      |                                             | 1.5577                                      |                                             | 2.7618                                      |                                             |
| t probability <sup>¶</sup>   |                                             | 0.1889                                      |                                             | 0.2110                                      |                                             | 0.1800                                      |                                             | 0.0221                                      |                                             |

\*Motif database scanning has been carried by out using PATTINPROT (1).

<sup>†</sup>Motif probabilities have been calculated as the product of the expected individual amino acid frequencies (see *Methods* in the main text).

<sup>‡</sup> $O_{WEFXX}$  ( $O_{XXWEF}$ ) is the number of hits of an amyloid breaker motif that have been found on the database.

<sup>§</sup> $E_{WEFXX}$  ( $E_{XXWEF}$ ) is the expected number of hits of a given amyloid breaker motif based on the average composition of proteins (see *Methods* in the main text) and the total number of WEF hits found in database [ $O_{WEF}$  (NR) = 7,230;  $O_{WEF}$  (Tr) = 5,955;  $O_{WEF}$  (SP + Tr) = 6,887;  $O_{WEF}$  (SP) = 932].

<sup>¶</sup>Student's test of significance. Only data where  $O > E$  have been compared (boldface data).

1. Combet, C., Blanchet, C., Geourjon, C. & Deleage, G. (2000) *Trends Biochem. Sci.* **25**, 147-150.
