# Supplementary material
Source: PubMed Central journal article supplement (PMC314143)
Supplement: pnas_101_1_87__6.pdf [file pnas_101_1_87__6.pdf]

**Table 10. Expected vs. actual frequency of the three-residue amyloidogenic motif LNF surrounded by amyloid breakers in protein databases**

| Motif*  | $P_{LNFXX}$<br>( $P_{XXLNF}$ ) <sup>†</sup> | Nonredundant protein sequences (NR)*        |                                             | TrEMBL (Tr)*                                |                                             | Swiss-Prot and TrEMBL (SP + Tr)*            |                                             | Swiss-Prot (SP)*                            |                                             |
|---------|---------------------------------------------|---------------------------------------------|---------------------------------------------|---------------------------------------------|---------------------------------------------|---------------------------------------------|---------------------------------------------|---------------------------------------------|---------------------------------------------|
|         |                                             | $O_{LNFXX}$<br>( $O_{XXLNF}$ ) <sup>‡</sup> | $E_{LNFXX}$<br>( $E_{XXLNF}$ ) <sup>§</sup> | $O_{LNFXX}$<br>( $O_{XXLNF}$ ) <sup>‡</sup> | $E_{LNFXX}$<br>( $E_{XXLNF}$ ) <sup>§</sup> | $O_{LNFXX}$<br>( $O_{XXLNF}$ ) <sup>‡</sup> | $E_{LNFXX}$<br>( $E_{XXLNF}$ ) <sup>§</sup> | $O_{LNFXX}$<br>( $O_{XXLNF}$ ) <sup>‡</sup> | $E_{LNFXX}$<br>( $E_{XXLNF}$ ) <sup>§</sup> |
| LNF ++  | 2.219e <sup>-6</sup>                        | 463                                         | 714.73                                      | 521                                         | 841.69                                      | 426                                         | 694.77                                      | 78                                          | 86.87                                       |
| ++ LNF  | 2.219e <sup>-6</sup>                        | <b>804</b>                                  | <b>714.73</b>                               | 811                                         | 841.69                                      | 645                                         | 694.77                                      | <b>106</b>                                  | <b>86.87</b>                                |
| LNF --  | 2.380e <sup>-6</sup>                        | 545                                         | 766.68                                      | 722                                         | 902.87                                      | 535                                         | 745.27                                      | 95                                          | 93.18                                       |
| -- LNF  | 2.380e <sup>-6</sup>                        | 504                                         | 766.68                                      | 608                                         | 902.87                                      | 496                                         | 745.27                                      | <b>115</b>                                  | <b>93.18</b>                                |
| P LNF   | 7.784e <sup>-6</sup>                        | 1,523                                       | 2,507.0                                     | 1,739                                       | 2,952.3                                     | 1,443                                       | 2,437                                       | 242                                         | 304.70                                      |
| LNF P   | 7.784e <sup>-6</sup>                        | <b>12,795</b>                               | <b>2,507.0</b>                              | <b>13,885</b>                               | <b>2,952.3</b>                              | <b>12,739</b>                               | <b>2,437</b>                                | 254                                         | 304.70                                      |
| P + LNF | 8.718e <sup>-7</sup>                        | 140                                         | 253.05                                      | 166                                         | 298.01                                      | 136                                         | 245.99                                      | 25                                          | 30.76                                       |
| LNF + P | 8.718e <sup>-7</sup>                        | 169                                         | 253.05                                      | 217                                         | 298.01                                      | 156                                         | 245.99                                      | 25                                          | 30.76                                       |
| P – LNF | 9.029e <sup>-7</sup>                        | 143                                         | 290.82                                      | 162                                         | 342.48                                      | 136                                         | 282.70                                      | 28                                          | 35.35                                       |
| LNF – P | 9.029e <sup>-7</sup>                        | 145                                         | 290.82                                      | 188                                         | 342.48                                      | 145                                         | 282.70                                      | 34                                          | 35.35                                       |
| + P LNF | 8.718e <sup>-7</sup>                        | 145                                         | 253.05                                      | 194                                         | 298.01                                      | 145                                         | 245.99                                      | 20                                          | 30.76                                       |
| LNF P + | 8.718e <sup>-7</sup>                        | 156                                         | 253.05                                      | 197                                         | 298.01                                      | 156                                         | 245.99                                      | 33                                          | 30.76                                       |
| – P LNF | 9.029e <sup>-7</sup>                        | 166                                         | 290.82                                      | 193                                         | 342.48                                      | 162                                         | 282.70                                      | 18                                          | 35.35                                       |
| LNF P – | 9.029e <sup>-7</sup>                        | 212                                         | 290.82                                      | 261                                         | 342.48                                      | 208                                         | 282.70                                      | 21                                          | 35.35                                       |

\*Motif database scanning has been carried out by using PATTINPROT (1).

<sup>†</sup>Motif probabilities have been calculated as the product of the expected individual amino acid frequencies (see *Methods* in the main text).

<sup>‡</sup> $O_{LNFXX}$  ( $O_{XXLNF}$ ) is the number of hits of an amyloid breaker motif that have been found on the database.

<sup>§</sup> $E_{LNFXX}$  ( $E_{XXLNF}$ ) is the expected number of hits of a given amyloid breaker motif based on the average composition of proteins (see *Methods* in the main text) and the total number of LNF hits found in database [ $O_{LNF}$  (NR) = 56,977;  $O_{LNF}$  (Tr) = 67,098;  $O_{LNF}$  (SP + Tr) = 55,386;  $O_{LNF}$  (SP) = 6,925].

Data are in boldface if  $O > E$ .

1. Combet, C., Blanchet, C., Geourjon, C. & Deleage, G. (2000) *Trends Biochem. Sci.* **25**, 147-150.
