# Supplementary material
Source: PubMed Central journal article supplement (PMC314143)
Supplement: pnas_101_1_87__7.pdf [file pnas_101_1_87__7.pdf]

**Table 12. Expected vs. actual frequency of the three-residue amyloidogenic motif WEF surrounded by amyloid breakers in protein sequences**

| Database*                                             | WEF P <sup>†</sup>             |                                | P – WEF <sup>†</sup>            |                                 | WEF P + <sup>†</sup>            |                                 |
|-------------------------------------------------------|--------------------------------|--------------------------------|---------------------------------|---------------------------------|---------------------------------|---------------------------------|
|                                                       | O <sub>WEFP</sub> <sup>§</sup> | E <sub>WEFP</sub> <sup>¶</sup> | O <sub>P-WEF</sub> <sup>§</sup> | E <sub>P-WEF</sub> <sup>¶</sup> | O <sub>WEFP+</sub> <sup>§</sup> | E <sub>WEFP+</sub> <sup>¶</sup> |
| Nonredundant (NR)                                     | 551                            | 318.12                         | 1,124                           | 36.90                           | 160                             | 35.63                           |
| TrEMBL (Tr)                                           | 440                            | 262.02                         | 967                             | 30.39                           | 117                             | 29.35                           |
| Swiss-Prot and TrEMBL (SP + Tr)                       | 537                            | 303.03                         | 991                             | 35.15                           | 153                             | 33.94                           |
| Swiss-Prot (SP)                                       | 97                             | 41.01                          | 24                              | 4.76                            | 36                              | 4.59                            |
| P <sub>WEFXX</sub> (P <sub>XXWEF</sub> ) <sup>‡</sup> | 1.486e <sup>-6</sup>           |                                | 1.724e <sup>-7</sup>            |                                 | 1.664e <sup>-7</sup>            |                                 |
| Mean difference <sup>  </sup>                         | 175.206                        |                                | 749.699                         |                                 | 90.623                          |                                 |
| df <sup>  </sup>                                      | 3                              |                                | 3                               |                                 | 3                               |                                 |
| t value <sup>  </sup>                                 | 4.1883                         |                                | 3.0504                          |                                 | 4.2473                          |                                 |
| t probability <sup>  </sup>                           | 0.02481                        |                                | 0.05541                         |                                 | 0.02391                         |                                 |

\*Motif database scanning has been carried out by using PATTINPROT (1).

<sup>†</sup>Only motifs where the difference between the number of observed and expected hits is statistically significant at a confidence level  $\geq 5\%$ .

<sup>‡</sup>Motif probabilities have been calculated as the product of the expected individual amino acid frequencies (see *Methods* in the main text).

<sup>§</sup>O<sub>WEFXX</sub> (O<sub>XXWEF</sub>) is the number of hits of an amyloid breaker motif that have been found on the database.

<sup>¶</sup>E<sub>WEFXX</sub> (E<sub>XXWEF</sub>) is the expected number of hits of a given amyloid breaker motif based on the average composition of proteins (see *Methods* in the main text) and the total number of WEF hits found in the database [O<sub>WEF</sub> (NR) = 7,230; O<sub>WEF</sub> (Tr) 5,955; O<sub>WEF</sub> (SP + Tr) = 6,887; O<sub>WEF</sub> (SP) = 932].

<sup>||</sup>Student's test of significance.

1. Combet, C., Blanchet, C., Geourjon, C. & Deleage, G. (2000) *Trends Biochem. Sci.* **25**, 147-150.
