# Supplementary material
Source: PubMed Central journal article supplement (PMC314143)
Supplement: pnas_101_1_87__8.pdf [file pnas_101_1_87__8.pdf]

**Table 13. Expected vs. actual frequency of the three-residue amyloidogenic motif LNF surrounded by amyloid breakers in protein sequences**

| Database*                                | LNF P <sup>†</sup>     |                        |
|------------------------------------------|------------------------|------------------------|
|                                          | $O_{LNF}$ <sup>§</sup> | $E_{LNF}$ <sup>¶</sup> |
| Nonredundant (NR)                        | 12,793                 | 2,507.00               |
| TrEMBL (Tr)                              | 13,885                 | 2,952.30               |
| Swiss-Prot + TrEMBL (SP + Tr)            | 12,739                 | 2,437.00               |
| Swiss-Prot (SP)                          | 115                    | 93.18                  |
| $P_{LNFXX}$ ( $P_{XXLNF}$ ) <sup>‡</sup> | 9.029e <sup>-7</sup>   |                        |
| Mean difference <sup>  </sup>            | 7885.63                |                        |
| df <sup>  </sup>                         | 3                      |                        |
| <i>t</i> value <sup>  </sup>             | 3.0034                 |                        |
| <i>t</i> probability <sup>  </sup>       | 0.05751                |                        |

\*Motif database scanning has been carried out by using PATTINPROT (1).

<sup>†</sup>Only motifs where the difference between the number of observed and expected hits is statistically significant at a confidence level  $\geq 5\%$

<sup>‡</sup>Motif probabilities have been calculated as the product of the expected individual amino acid frequencies (see *Methods* in the main text).

<sup>§</sup> $O_{LNFXX}$  ( $O_{XXLNF}$ ) is the number of hits of an amyloid breaker motif that have been found on the database.

<sup>¶</sup> $E_{LNFXX}$  ( $E_{XXLNF}$ ) is the expected number of hits of a given amyloid breaker motif based on the average composition of proteins (see *Methods* in the main text) and the total number of LNF hits found in database [ $O_{LNF}$  (NR) 56,977;  $O_{LNF}$  (Tr) = 67,098;  $O_{LNF}$  (SP + Tr) = 55,386;  $O_{LNF}$  (SP) = 6,925].

<sup>||</sup>Student's test of significance.

1. Combet, C., Blanchet, C., Geourjon, C. & Deleage, G. (2000) *Trends Biochem. Sci.* **25**, 147-150.
