# Supplementary material
Source: PubMed Central journal article supplement (PMC314143)
Supplement: pnas_101_1_87__17.pdf [file pnas_101_1_87__17.pdf]

**Table 11. Expected vs. actual frequency of the three-residue amyloidogenic motif LEF surrounded by amyloid breakers in protein sequences**

| Database*                                             | ++ LEF <sup>†</sup>             |                                 | LEF -- <sup>†</sup>             |                                 | -- LEF <sup>†</sup>             |                                 | - P LEF <sup>†</sup>            |                                 |
|-------------------------------------------------------|---------------------------------|---------------------------------|---------------------------------|---------------------------------|---------------------------------|---------------------------------|---------------------------------|---------------------------------|
|                                                       | O <sub>++LEF</sub> <sup>§</sup> | E <sub>++LEF</sub> <sup>¶</sup> | O <sub>LEF--</sub> <sup>§</sup> | E <sub>LEF--</sub> <sup>¶</sup> | O <sub>--LEF</sub> <sup>§</sup> | E <sub>--LEF</sub> <sup>¶</sup> | O <sub>-PLEF</sub> <sup>§</sup> | E <sub>-PLEF</sub> <sup>¶</sup> |
| Nonredundant (NR)                                     | 1,055                           | 571.86                          | 763                             | 613.43                          | 873                             | 613.43                          | 248                             | 232.69                          |
| TrEMBL (Tr)                                           | 1,206                           | 613.08                          | 877                             | 722.01                          | 1,026                           | 722.01                          | 292                             | 273.87                          |
| Swiss-Prot and TrEMBL (SP +Tr)                        | 1,032                           | 551.14                          | 732                             | 591.20                          | 854                             | 591.20                          | 245                             | 224.26                          |
| Swiss-Prot (SP)                                       | 117                             | 97.932                          | 145                             | 105.05                          | 175                             | 105.05                          | 56                              | 39.848                          |
| P <sub>LEFXX</sub> (P <sub>XXLEF</sub> ) <sup>‡</sup> | 3.812e <sup>-6</sup>            |                                 | 4.089e <sup>-6</sup>            |                                 | 4.089e <sup>-6</sup>            |                                 | 1.551e <sup>-6</sup>            |                                 |
| Mean difference <sup>  </sup>                         | 393.947                         |                                 | 121.327                         |                                 | 224.077                         |                                 | 17.583                          |                                 |
| df <sup>  </sup>                                      | 3                               |                                 | 3                               |                                 | 3                               |                                 | 3                               |                                 |
| t value <sup>  </sup>                                 | 3.0858                          |                                 | 4.447                           |                                 | 4.2795                          |                                 | 14.563                          |                                 |
| t probability <sup>  </sup>                           | 0.05389                         |                                 | 0.02115                         |                                 | 0.02344                         |                                 | 0.00070                         |                                 |

\*Motif database scanning has been carried out by using PATINPROT (1).

<sup>†</sup>Only motifs where the difference between the number of observed and expected hits is statistically significant at a confidence level  $\geq 5\%$ .

<sup>‡</sup>Motif probabilities have been calculated as the product of the expected individual amino acid frequencies (see *Methods* in the main text).

<sup>§</sup>O<sub>LEFXX</sub> (O<sub>XXLEF</sub>) is the number of hits of an amyloid breaker motif that have been found on the database.

<sup>¶</sup>E<sub>LEFXX</sub> (E<sub>XXLEF</sub>) is the expected number of hits of a given amyloid breaker motif based on the average composition of proteins (see *Methods* in the main text) and the total number of LEF hits found in database [O<sub>LEF</sub> (NR) = 45,588; O<sub>LEF</sub> (Tr) = 53,657; O<sub>LEF</sub> (SP + Tr) = 43,936; O<sub>LEF</sub> (SP) = 7,807].

<sup>||</sup>Student's test of significance.

1. Combet, C., Blanchet, C., Geourjon, C. & Deleage, G. (2000) *Trends Biochem. Sci.* **25**, 147-150.
