# Supplementary material
Source: PubMed Central journal article supplement (PMC314143)

**a. STVIE (1)**

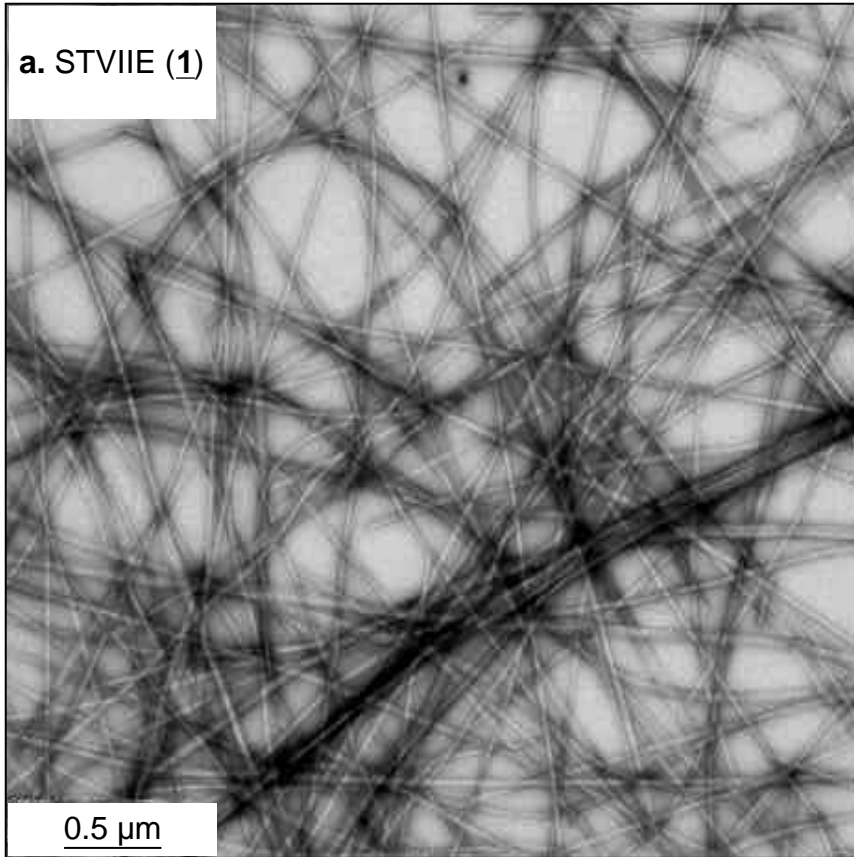

**b. STVII**

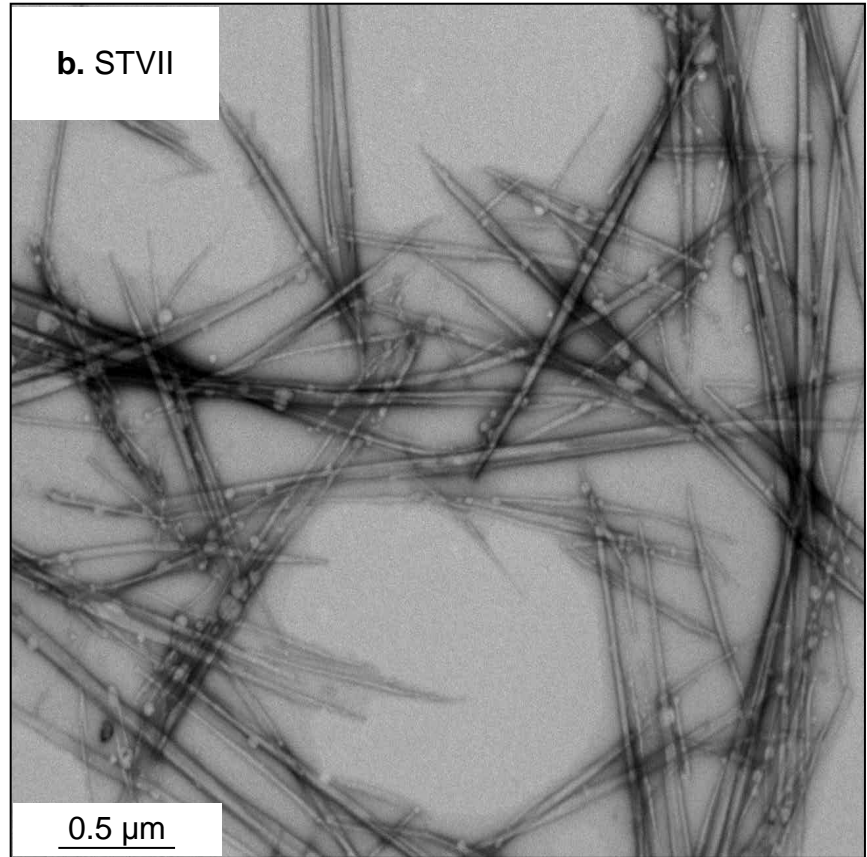

Supplement: pnas_101_1_87__10.pdf [file pnas_101_1_87__10.pdf]

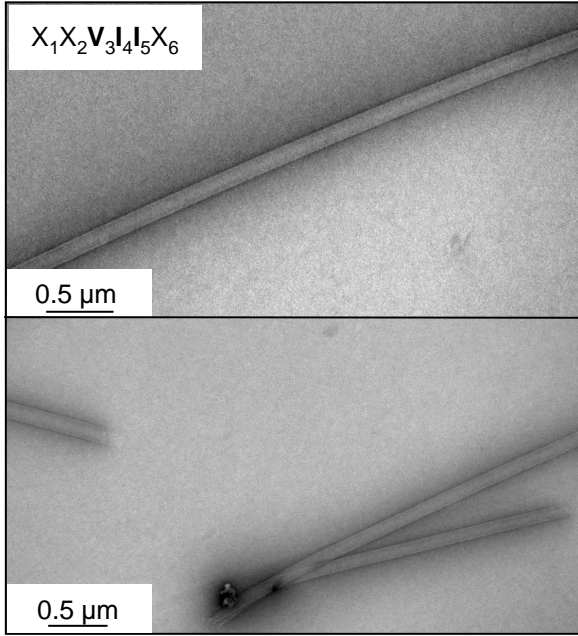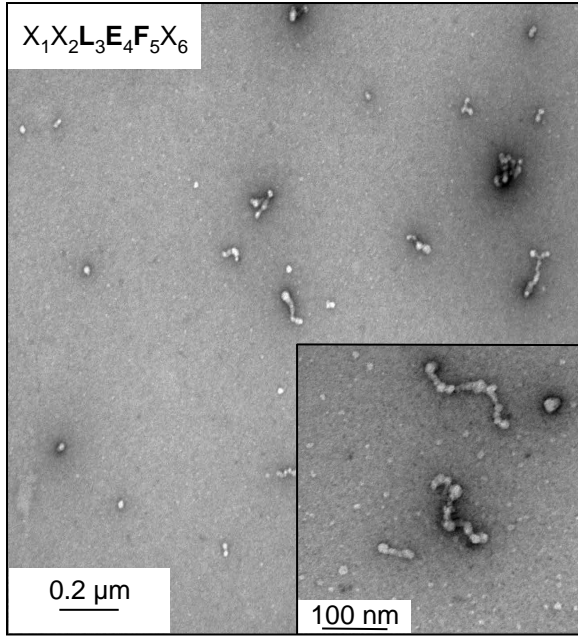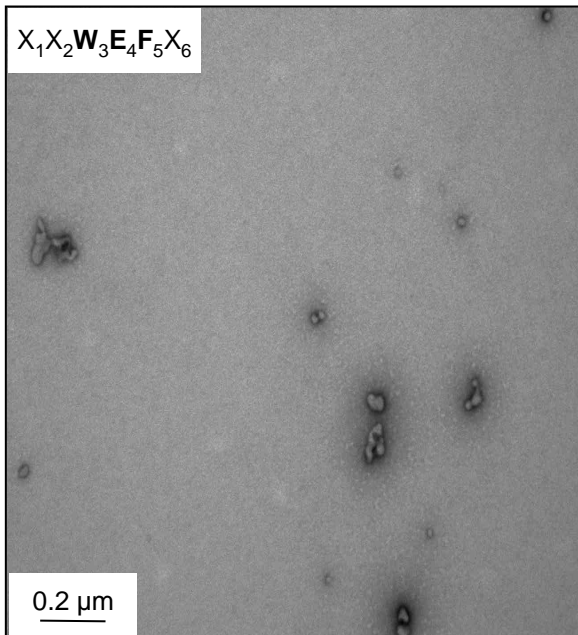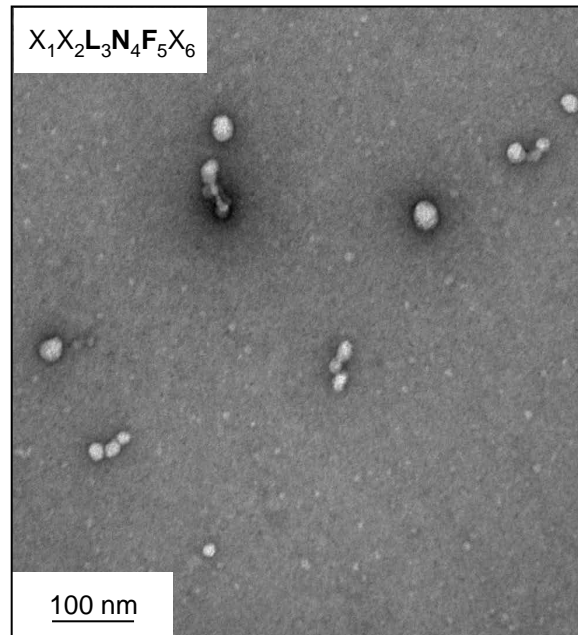

Supplement: pnas_101_1_87__12.pdf [file pnas_101_1_87__12.pdf]

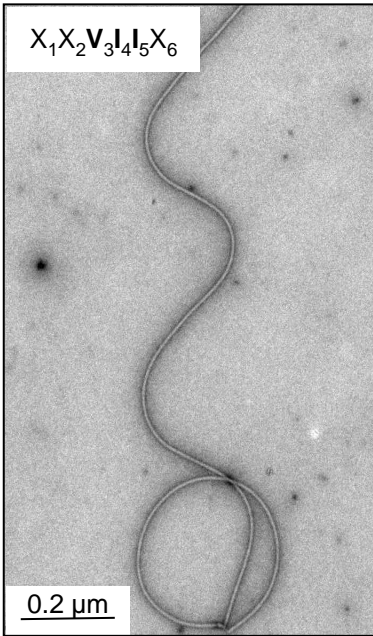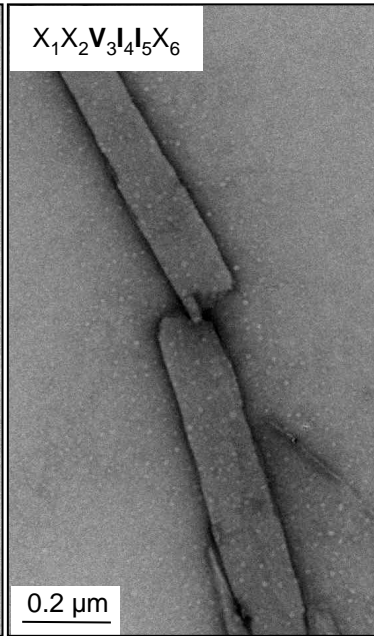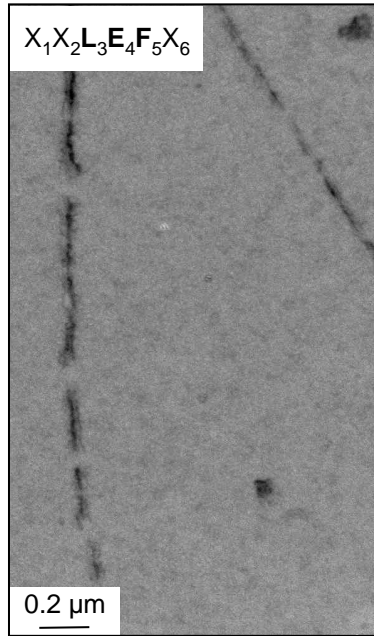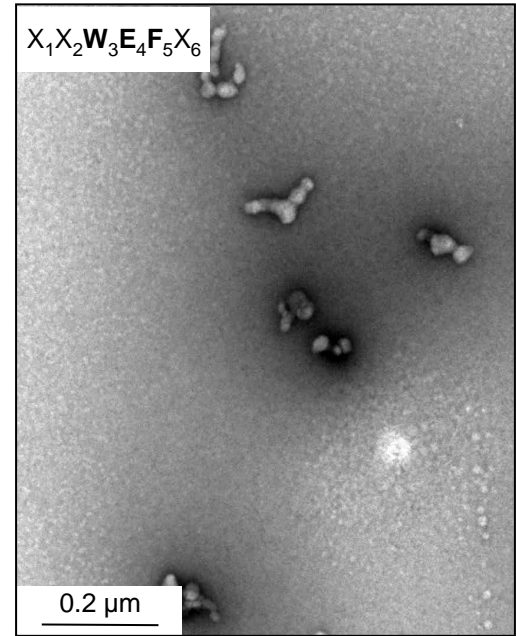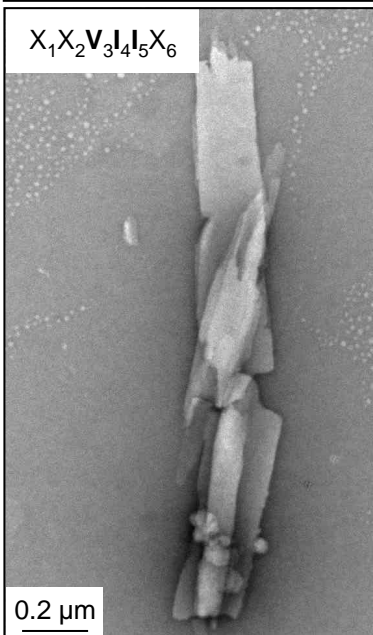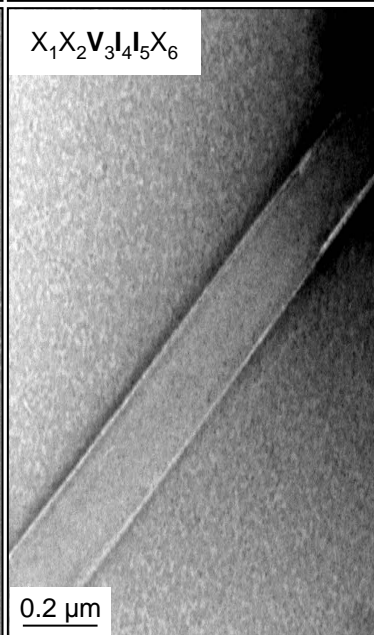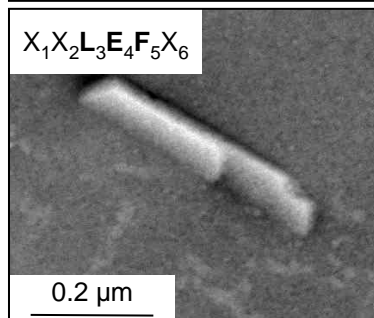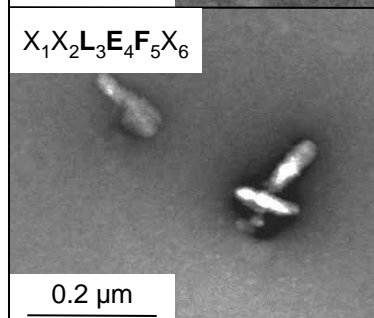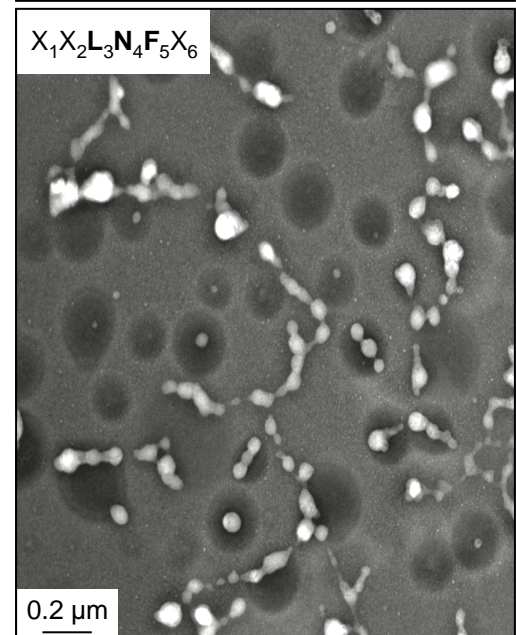

Supplement: pnas_101_1_87__13.pdf [file pnas_101_1_87__13.pdf]

# different core / identical edges

group (I)

group (II)

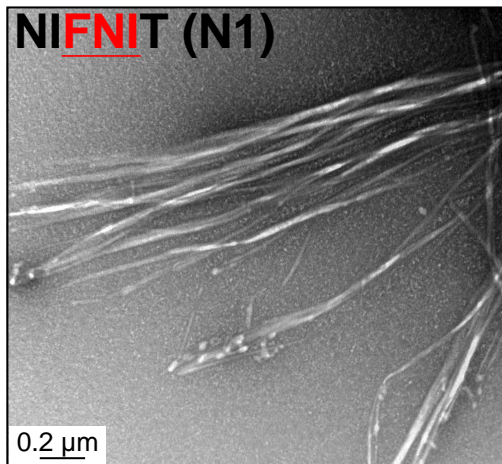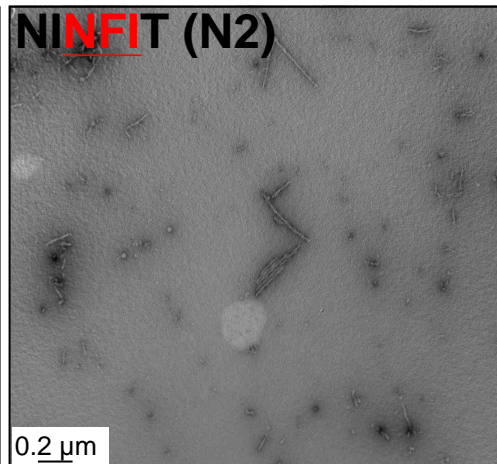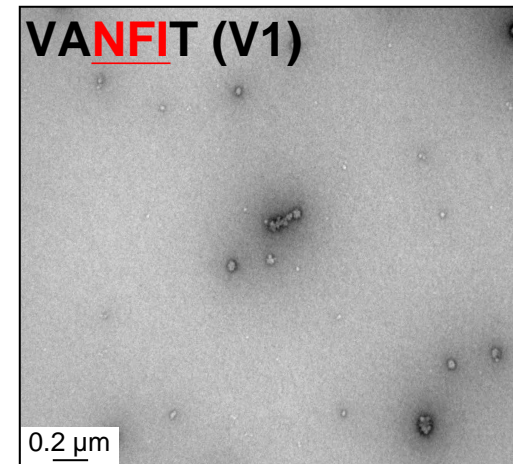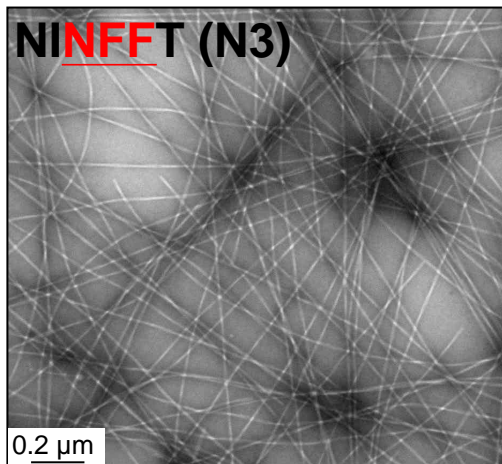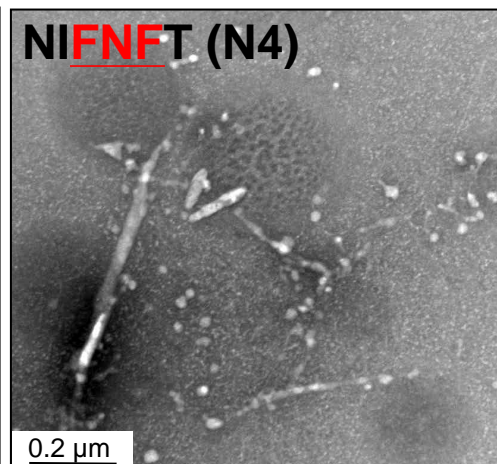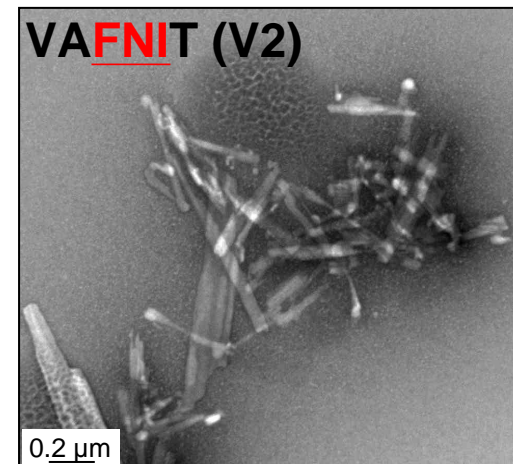

Supplement: pnas_101_1_87__15.pdf [file pnas_101_1_87__15.pdf]

# identical core / different edges

group (III)

group (IV)

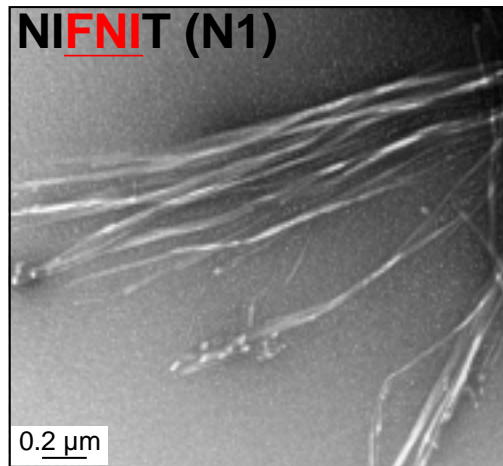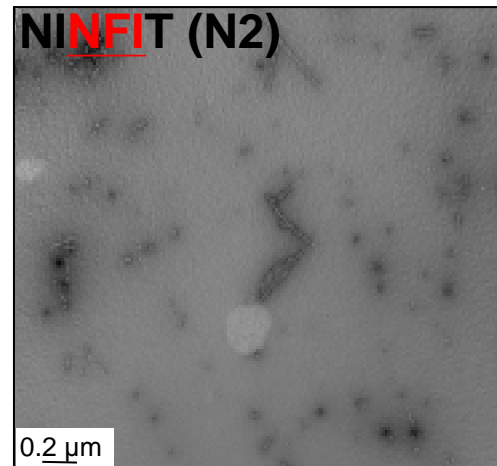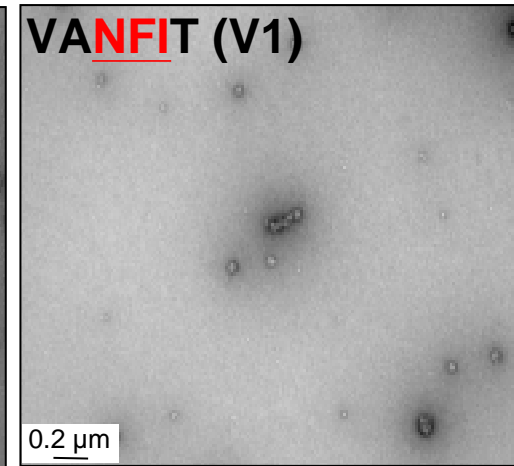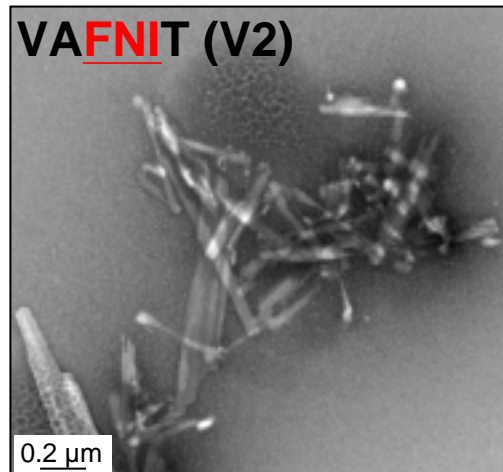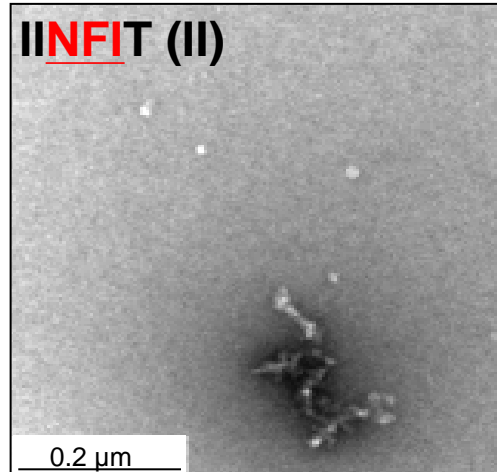

Supplement: pnas_101_1_87__16.pdf [file pnas_101_1_87__16.pdf]
